# Supplementary material for: Detecting Blastocyst Components by Artificial Intelligence for Human Embryological Analysis to Improve Success Rate of In Vitro Fertilization
Source: MDPI journal article supplement (doi:10.3390/jpm12020124), 2022-01-18
Supplement: s1 [file s1]

# Supplementary Materials

**Table S1.** Feature Map Size for the proposed SSS-Net.

| Block       | Layer         | (K,K)/S,F   | Output<br>(width(height)2, number of channels) |
|-------------|---------------|-------------|------------------------------------------------|
| Input       | Conv-in       | (3,3)/1,32  | 400 <sup>2</sup> ,32                           |
|             | Sep-Conv1     | (3,3)/1,32  | 400 <sup>2</sup> ,32                           |
|             | Conv-A-1_1*   | (1,1)/1,16  | 400 <sup>2</sup> ,16                           |
|             | Conv-AS1*     | (3,1)/1,8   | 400 <sup>2</sup> ,8                            |
| SCB-1       | Conv-AS2*     | (1,3)/1,8   | 400 <sup>2</sup> ,8                            |
|             | Cat-SCB1-A    | -           | 400 <sup>2</sup> ,16                           |
|             | Conv-A-3_3    | (3,3)/1,16  | 400 <sup>2</sup> ,16                           |
|             | Cat-SCB1-B    | -           | 400 <sup>2</sup> ,64                           |
|             | Conv-A-1_1*   | (1,1)/1,32  | 400 <sup>2</sup> ,32                           |
|             | Conv-Stride-1 | (3,3)/2,64  | 200 <sup>2</sup> ,64                           |
| SCB-2       | Same as SCB-1 | F×2         | 200 <sup>2</sup> ,64                           |
| Reduction   | Conv-Stride-2 | (3,3)/2,128 | 200 <sup>2</sup> ,128                          |
| SCB-3       | Same as SCB-2 | F×2         | 100 <sup>2</sup> ,128                          |
| Reduction   | Conv-Stride-3 | (3,3)/2,256 | 50 <sup>2</sup> ,256                           |
| SCB-4       | Same as SCB-3 | F×2         | 50 <sup>2</sup> ,384                           |
| Final Block | Conv-F1-3_3   | (3,3)/1,384 | 50 <sup>2</sup> ,384                           |
|             | Conv-F2-3_3   | (3,3)/1,256 | 50 <sup>2</sup> ,256                           |
|             | Conv-F3-3_3   | (3,3)/1,256 | 50 <sup>2</sup> ,256                           |
|             | Conv-F4-3_3   | (3,3)/1,128 | 50 <sup>2</sup> ,128                           |
|             | Tconv-F1      | (2,2)/1,64  | 100 <sup>2</sup> ,64                           |
|             | Tconv-F2      | (2,2)/1,32  | 200 <sup>2</sup> ,32                           |
|             | Tconv-F3      | (2,2)/1,32  | 400 <sup>2</sup> ,32                           |
|             | Cat-F         | -           | 400 <sup>2</sup> ,64                           |
|             | Conv-Mask     | (1,1)/1,5   | 400 <sup>2</sup> ,5                            |

Total number of trainable parameters = 4.04 Million

Abbreviations: SCB, sprint convolutional block, Conv-in, input convolution, Sep-Conv1, separable convolution-1, Conv-A-1\_1, 1 × 1 convolution-1, Conv-AS1, asymmetric kernel convolution-1, Conv-AS2, asymmetric kernel convolution-2, Cat-SCB1-A, sprint convolutional block-1 concatenation-1, Conv-A-3\_3, 3 × 3 convoltuinal-1, Cat-SCB1-B, sprint convolutional block-1 concatenation-2, Conv-Stride- convolution with stride, Conv-F1-3\_3, 3 × 3 convoltuinal-1 of final block, Conv-F2-3\_3, 3 × 3 convoltuinal-2 of final block, Conv-F3-3\_3, 3 × 3 convoltuinal-2 of final block, Conv-F4-3\_3, 3 × 3 convoltuinal-4 of final block, Tconv-F1, transposed convolution-1 of final block, Tconv-F2, transposed convolution-2 of final block, Tconv-F3, transposed convolution-3 of final block, Cat-F, final concatenation, Conv-Mask, mask convolution, K, kernel size, S, stride, F, number of filters. Symbol “\*” show that the layers are without batch normalization (BN) rectified linear unit (ReLU). The symbol “-” show that this information is not available for that specific layer.

## Section. S1. Grad-CAM Explanation of the Proposed Method

The effective development of these networks requires knowledge of the key features in the image that are required to conclude the prediction of a specific class. The development principles may change according to the application and key features for better accuracy. The gradient-weighted activation (Grad-CAM) [47] is a scheme that enlightens the

beneficial features that are chosen by the neural network to predict the candidate class. Figure S1 shows the Grad-CAM of SSS-Net taken from the intermediate layers of the network as an example. Figure S1 (c)–(f) show the heat maps obtained from Conv-F4-3\_3, Tconv-F1, Tconv-F2, and Tconv-F3 of Table S1 (Supplementary Materials), respectively. The following are important points that are concluded herein.

- Robust semantic segmentation architecture can provide accurate blastocyst component segmentation (ZP, TE, BL, ICM, etc.);
- The deep learning-based model can perform multiclass segmentation in one step, and does not require training of the network several times for different classes;
- To achieve semantic segmentation, a decoder that is the same as the encoder is not required. A shallow decoder can perform well (SSS-Net uses only three transposed convolutions for upsampling);
- The SCB helps to reduce the number of parameters by using asymmetric kernel convolutions and depth-wise separable convolutions. The SSS-Net consumes only 4.04 million trainable parameters;
- If the size of the feature map is significantly reduced (using multiple pooling layers), it can miss minor information. The SSS-Net downsamples the image three times with a final feature map size of  $50 \times 50$ , which is sufficient to represent useful spatial information;
- The initial layers contain spatial edge information. If this information is provided to the final layers of the network, the segmentation performance can be improved;
- Accurate segmentation of blastocyst components can ease the morphological analysis by the embryologist.

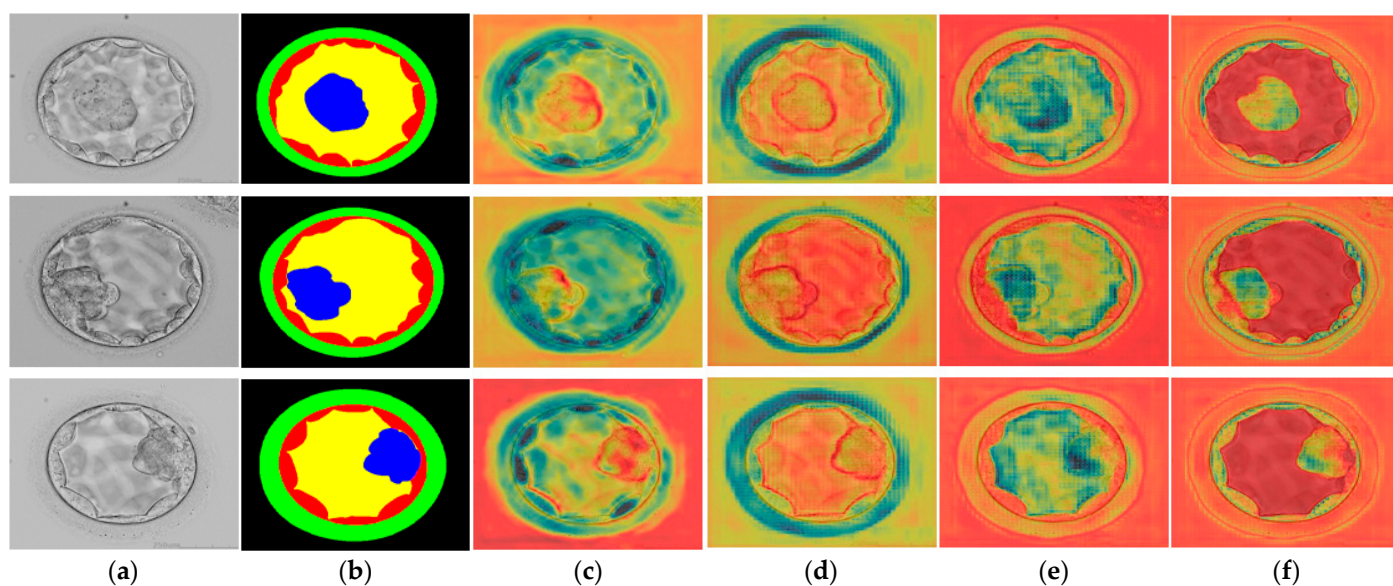

**Figure S1.** Grad-CAM visualization of SSS-Net. Three examples are shown in three rows: (a) input blastocyst and (b) GT images. (c)–(f) Images taken from Conv-F4-3\_3, Tconv-F1, Tconv-F2, and Tconv-F3 of Table S1 (Supplementary Materials), respectively. Abbreviations: Grad-CAM, gradient weighted class activation mapping, SSS-Net, sprint semantic segmentation network, GT, ground truth.

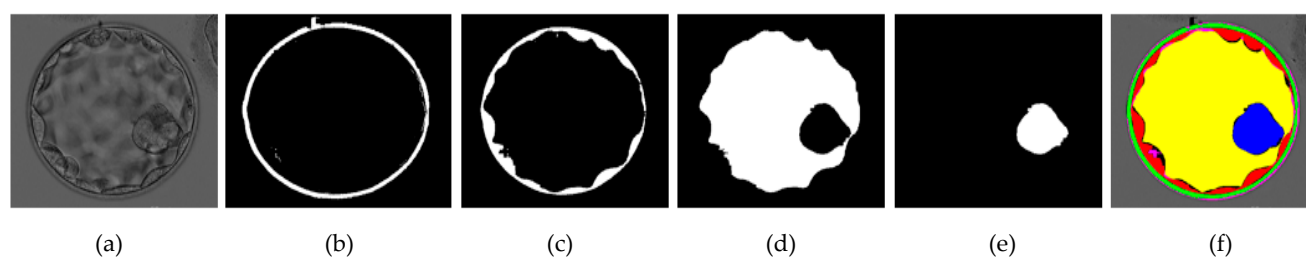

**Figure S2.** Predicted masks of blastocyst components for embryological analysis by SSS-Net: (a) input blastocyst image and (b) ZP, (c) TE, (d) BL, (e) ICM, and (f) combined predicted masks. Abbreviations: SSS-Net, sprint semantic segmentation network, ZP, zona pellucida, TE, trophoblast, BL, blastocoel, ICM, inner cell mass.
